# Supplementary material for: OsVIT2 Mutation Increases Fe and Zn of Grain Without Compromising the Growth in Paddy Field
Source: Front Plant Sci. 2022 Jun 22;13:868661. doi: 10.3389/fpls.2022.868661 (PMC9257253; doi:10.3389/fpls.2022.868661)
Supplement: Supplementary file 2 [file Table_1.xlsx]

## Sheet: Table S1
Supplementary Table 1 List of primers used in the study
Primer ID	Primer Name	Sequence	Note
1	OsVIT1 LOC_Os04g38940 R	GAATGGTTTCTGCAAGCTGGG	Amplification of genomic seq of OsVIT1
2	OsVIT1 LOC_Os04g38940 F	CGTGCCGGAGAGAAGAACTA	Amplification of genomic seq of OsVIT1
3	OsVIT1 LOC_Os04g38940 Seq 2	TATCCACGCGGATGTTGCAT	Seq primer for OsVIT1
4	OsVIT1 LOC_Os04g38940 Seq 3	GGAGGGAGTACAAGCCAGGT
5	OsVIT1 LOC_Os04g38940 Seq 4	CTGAAACATGTCGCTAAAGTTG
6	OsVIT1 LOC_Os04g38940 Seq 5	GGGCCCACCATAGAAACAGT
7	OsVIT1 LOC_Os04g38940 Seq 6	TGTGTGTTCCTTGTCCATGC
8	OsVIT1 LOC_Os04g38940 Seq 7	AGATGAAGATTAAGTTTTTCACGC
9	OsVIT1 LOC_Os04g38940 Seq 8	AAGCCCATAGTGTTCGTTGC
10	OsVIT1 LOC_Os04g38940 Seq 9	CTCAAGCTTGGCTCGACTTC
11	OsVIT1 LOC_Os04g38940 Seq 10	AAGGCCGTGCAAACTAGATG
12	OsVIT1 LOC_Os04g38940 Seq 11	CAGGAGCCCAGGACAATCAT
13	OsVIT2 LOC_Os09g23300 F	GACCGGTTAATTTCCCAACCG	Amplification of genomic seq of OsVIT2
14	OsVIT2 LOC_Os09g23300 R	AACCGACGGCACCGATCTAC	Amplification of genomic seq of OsVIT2
15	OsVIT2 LOC_Os09g23300 Seq 2	CGAGCAGTGTTTTCAACTAGGC	Seq primer for OsVIT2
16	OsVIT2 LOC_Os09g23300 Seq 3	GCTGTAGGTGCCACCGTTAT
17	OsVIT2 LOC_Os09g23300 Seq 4	CATGCCATGTTTCGTAATTGGA
18	OsVIT2 LOC_Os09g23300 Seq 5	CGAAGATGGTGAAGGAGTTCGT
19	OsVIT2 LOC_Os09g23300 Seq 6	GGAGCAGGAGGAGATCGACA
20	OsVIT2 LOC_Os09g23300 Seq 7	GTGCCACTCCTACCCTACAT
21	OsVIT2 LOC_Os09g23300 Seq 8	AGGTAGTTCGGTGCATTGAGAG
22	OsVIT2 LOC_Os09g23300 Seq 9	GACCACTCGTTGCTGTTGTTC
23	OsVIT2 LOC_Os09g23300 Seq 10	CCTGTCAGGCCCATCCCTAAC
24	OsVIT2 gene F1	ATGCATGCGTTTTCACAGCC	Amplification of region containing mutation
25	OsVIT2 gene R1	TGTAGGGTAGGAGTGGCACC
26	qRT-PCR OsVIT2 gene F	GGTATCTGGCGGCGAAGAG	qRT-PCR
27	qRT-PCR OsVIT2 gene R	CGACAGTATGTCCGCGATCT
28	ubq-F	AACCAGCTGAGGCCCAAGA	qRT-PCR
29	ubq-R	ACGATTGATTTAACCAGTCCATGA
30	OsVIT2_DdeI_F	CCGCGGAGATCGCGGACATACTGTCGCACTA	dCAPS primers to detect the mutation
31	OsVIT2_DdeI_R	AATTAGTTTTTTCCCCTTACTTCATC
